# Supplementary material
Source: PubMed Central journal article supplement (PMC3961644)
Supplement: supp_M113.509331_jbc.M113.509331-1.pdf [file supp_M113.509331_jbc.M113.509331-1.pdf]

Kakoi *et al.* Supplemental Table1

| mouse          | Forward                       | Reverse                        |
|----------------|-------------------------------|--------------------------------|
| <i>Hprt1</i>   | 5' -CGTTGGGCTTACCTCACTGCTT-3' | 5' -CAAAAAGCGGTCTGAGGAGGAA-3'  |
| <i>Id1</i>     | 5' -CAGGGGATCTCTGGGAAAGACA-3' | 5' -CCCAAAGTCTCTGGAGGCTGAA-3'  |
| <i>Col1a1</i>  | 5' -ATTTCGGACTAGACATTGGCCC-3' | 5' -GGTTGTTGCTCTGTTTCCAGG-3'   |
| <i>Col3a1</i>  | 5' -CAAACACGCAAGGCAATGAGAC-3' | 5' -CTTGATCAGGACCCCAATGTC-3'   |
| <i>Col2a1</i>  | 5' -ACTGTCCCTCGGAAAACTGG-3'   | 5' -TCGCCATAGCTGAAGTGGAAAG-3'  |
| <i>Col10a1</i> | 5' -TTCAGGGAGTGCAATCATGGAG-3' | 5' -GCAATTGGAGCCATACCTGGTC-3'  |
| <i>Acan</i>    | 5' -GGAGTTGAGACTGGGAGCAG-3'   | 5' -ACACAGTGGGAAACCTGAG-3'     |
| <i>Smpd3</i>   | 5' -CTGTTCTGCACGGTCCCTTCA-3'  | 5' -CCGTGCCCTTCCATTCACCTAAG-3' |
| <i>Runx1</i>   | 5' -CATGGCTACGGTTCAGATGTGC-3' | 5' -TCAGAACCAGCGGTAGGCTTC-3'   |
| <i>Runx2</i>   | 5' -CCAAGTAGCCAGGTTCACGATC-3' | 5' -GTGAACTCTTGCCCTCGTCCG-3'   |
| <i>Runx3</i>   | 5' -CATCCAAACCCACCTCTTGTC-3'  | 5' -GGCAGGGGTAGCCTCTGATTCT-3'  |
| <i>Has1</i>    | 5' -TGCCAAATTCCTAGCGTTGGTT-3' | 5' -GGCAACACGGGGACGTAGTTAG-3'  |
| <i>Has2</i>    | 5' -AGCCTTGTGGCGAAGCAAAA-3'   | 5' -GTCTGCGCAGTGAGGAAGCA-3'    |
| <i>Has3</i>    | 5' -CCATCTGGGTGGCAGTTCTTCT-3' | 5' -ATGGCCCCAGAGACTAGGAAGG-3'  |

  

| human         | Forward                       | Reverse                       |
|---------------|-------------------------------|-------------------------------|
| <i>HPRT1</i>  | 5' -AATTGACACTGGCAAAACAATG-3' | 5' -GGATTATACTGCCTGACCAAGG-3' |
| <i>COL1A1</i> | 5' -TTCCTTTCGATTCATCTCAA-3'   | 5' -TTGAATGCACTTTTGGTTTTTG-3' |
| <i>COL3A1</i> | 5' -ACTCCTGGTCTGCAAGGAATGC-3' | 5' -CATCTTCCCTGGGACACCATC-3'  |
| <i>SMPD3</i>  | 5' -ACACCTCCCTCAGCACCAAGAC-3' | 5' -TCCATAGGCAGCCACAATGAGA-3' |
